# Supplementary material for: Two novel lead-based coordination polymers for luminescence sensing of anions, cations and small organic molecules
Source: Royal Society of Chemistry journal article supplement (doi:10.1039/d0dt00533a), 2020-01-01
Supplement: d0dt00533a1.pdf [file d0dt00533a1.pdf]

## Supporting Information

### **Two novel lead-based coordination polymers for luminescence sensing of anions, cations and small organic molecules**

Xue-Yan Zhao,<sup>†a</sup> Bing Liang,<sup>†a</sup> Ke-Cai Xiong,<sup>\*a,b</sup> Yu-Wen Shi,<sup>a</sup> Si-Lei Yang,<sup>a</sup> Ting-Yu Wei,<sup>a</sup> Hui Zhang,<sup>a</sup> Qing-Fu Zhang,<sup>c</sup> and Yan-Li Gai<sup>\*a,b</sup>

<sup>a</sup> School of Chemistry and Materials Science, Jiangsu Normal University, Xuzhou, Jiangsu, 221116, P.R. China

<sup>b</sup> State Key Laboratory of Structural Chemistry, Fujian Institute of Research on the Structure of Matter, Chinese Academy of Sciences, Fuzhou, Fujian, 350002, P.R. China

<sup>c</sup> College of Chemistry and Chemical Engineering, Liaocheng University, Liaocheng, Shandong, 252059, P. R. China

Corresponding author:

\* E-mail: ylgai@jsnu.edu.cn, kcxiang@jsnu.edu.cn.

## Contents

1. Table S1. Selected Bond Lengths (Å) and Bond Angles (°) for compounds **1** and **2**.
2. Table S2. Comparison of sensing ability in terms of quenching coefficient ( $K_{sv}$ ) and limit of detection (LOD) of compounds toward  $\text{Cr}_2\text{O}_7^{2-}$ ,  $\text{CrO}_4^{2-}$ ,  $\text{Fe}^{3+}$  and NB.
3. Fig. S1. PXRD patterns of simulated and as-synthesized compounds **1** and **2**.
4. Fig. S2. TGA diagrams of as-synthesized compounds **1** and **2**.
5. Fig. S3  $I_0/I$  versus concentration of  $\text{Cr}_2\text{O}_7^{2-}$  plotted according to Stern-Volmer equation.
6. Fig. S4  $I_0/I$  versus concentration of  $\text{CrO}_4^{2-}$  plotted according to Stern-Volmer equation.
7. Fig. S5  $I_0/I$  versus concentration of  $\text{Fe}^{3+}$  plotted according to Stern-Volmer equation.
8. Fig. S6 (a) Luminescent intensity of compound **1** and sensing  $\text{Cr}_2\text{O}_7^{2-}$  (0.5 mM) during 5 times recycling experiments; (b) PXRD patterns of simulation, before and after 5 times recycling experiments.
9. Fig. S7 (a) Luminescent intensity of compound **1** and sensing  $\text{CrO}_4^{2-}$  (0.5 mM) during 5 times recycling experiments; (b) PXRD patterns of simulation, before and after 5 times recycling experiments.
10. Fig. S8 (a) Luminescent intensity of compound **1** and sensing  $\text{Fe}^{3+}$  (1.5 mM) during 5 times recycling experiments; (b) PXRD patterns of simulation, before and after 5 times recycling experiments.
11. Fig. S9 PXRD patterns of compound **1** before and after immersing in  $\text{Cr}_2\text{O}_7^{2-}$  aqueous solution for 5 hours and 24 hours.
12. Fig. S10 PXRD patterns of compound **1** before and after immersing in  $\text{CrO}_4^{2-}$  aqueous solution for 5 hours and 24 hours.
13. Fig. S11 PXRD patterns of compound **1** before and after immersing in  $\text{Fe}^{3+}$  aqueous solution for 5 hours and 24 hours.
14. Fig. S12 IR diagrams of compound **1** before and after immersing in  $\text{Cr}_2\text{O}_7^{2-}$  aqueous solution for 5 hours and 24 hours.
15. Fig. S13 IR diagrams of compound **1** before and after immersing in  $\text{CrO}_4^{2-}$  aqueous solution for 5 hours and 24 hours.
16. Fig. S14 IR diagrams of compound **1** before and after immersing in  $\text{Fe}^{3+}$  aqueous solution for 5 hours and 24 hours.
17. Fig. S15 UV-vis absorption spectra of compound **1** and  $\text{Cr}_2\text{O}_7^{2-}$ ,  $\text{CrO}_4^{2-}$  and  $\text{Fe}^{3+}$  aqueous solution (0.15mM).
18. Fig. S16  $I_0/I$  versus concentration of NB plotted according to Stern-Volmer equation.
19. Fig. S17 (a) Luminescent intensity of compound **1** and sensing NB during 5 times recycling experiments; (b) PXRD patterns of simulation, before and after 5 times recycling experiments.
20. Fig. S18 Normalized luminescent intensities of compound **1** dispersed in anion aqueous solution.
21. Fig. S19 Normalized luminescent intensities of compound **1** dispersed in metal cations aqueous solution.
22. Fig. S20 Normalized luminescent intensities of compound **1** dispersed in different organic solvents.
23. Fig. S21 Solid state excitation and emission spectra of free ligand. ( $\lambda_{ex} = 280 \text{ nm}$ ,  $\lambda_{em} = 402 \text{ nm}$ )

Table S1. Selected Bond Lengths (Å) and Bond Angles (°) for compounds **1** and **2**.

| <b>Compound 1</b>   |                     |                   |             |
|---------------------|---------------------|-------------------|-------------|
| Bond                | Distance/Å          | Bond              | Distance/Å  |
| Pb(1)-O(1)          | 2.431(6)            | Pb(1)-O(2)        | 2.521(6)    |
| Pb(1)-O(5B)         | 2.525(6)            | Pb(1)-O(4A)       | 2.622(7)    |
| Pb(1)-O(6C)         | 2.674(6)            | Pb(1)-O(3A)       | 2.678(6)    |
| Pb(1)-O(4C)         | 2.8900(1)           | Pb(1)-O(6B)       | 3.0537(1)   |
| Angle               | /°                  | Angle             | /°          |
| O(1)-Pb(1)-O(2)     | 52.2(2)             | O(1)-Pb(1)-O(5B)  | 77.0(2)     |
| O(2)-Pb(1)-O(5B)    | 80.4(2)             | O(1)-Pb(1)-O(4A)  | 78.4(2)     |
| O(2)-Pb(1)-O(4A)    | 115.0(2)            | O(5B)-Pb(1)-O(4A) | 131.1(2)    |
| O(1)-Pb(1)-O(6C)    | 105.3(2)            | O(2)-Pb(1)-O(6C)  | 76.41(19)   |
| O(5B)-Pb(1)-O(6C)   | 147.4(2)            | O(4A)-Pb(1)-O(6C) | 80.1(2)     |
| O(1)-Pb(1)-O(3A)    | 76.0(2)             | O(2)-Pb(1)-O(3A)  | 127.9(2)    |
| O(5B)-Pb(1)-O(3A)   | 83.3(2)             | O(4A)-Pb(1)-O(3A) | 49.8(2)     |
| O(6C)-Pb(1)-O(3A)   | 129.15(17)          | O(4C)-Pb(1)-O(6B) | 70.044(1)   |
| O(4C)-Pb(1)-O(5B)   | 92.611(2)           | O(4C)-Pb(1)-O(2)  | 91.774(2)   |
| O(4C)-Pb(1)-O(1)    | 143.321(2)          | O(4C)-Pb(1)-O(3C) | 138.262(2)  |
| O(4C)-Pb(1)-O(4A)   | 130.323(2)          | O(4C)-Pb(1)-O(6C) | 65.713(2)   |
| O(6B)-Pb(1)-O(6C)   | 133.302(2)          | O(6B)-Pb(1)-O(4A) | 120.448(1)  |
| O(6B)-Pb(1)-O(3A)   | 78.001(1)           | O(6B)-Pb(1)-O(1)  | 119.206(2)  |
| O(6B)-Pb(1)-O(2)    | 119.762(2)          | O(6B)-Pb(1)-O(5B) | 45.652(1)   |
| A, -x+1/2,y+1,z+1/2 | B, -x+1/2,y+1,z-1/2 | C, x-1/2,-y+1,z   |             |
| <b>Compound 2</b>   |                     |                   |             |
| Bond                | Distance /Å         | Bond              | Distance /Å |
| Pb(1)-O(5C)         | 2.447(2)            | Pb(1)-O(6C)       | 2.476(3)    |
| Pb(1)-O(4A)         | 2.496(3)            | Pb(1)-O(2B)       | 2.617(3)    |
| Pb(1)-O(3A)         | 2.656(2)            | Pb(1)-O(1)        | 2.685(3)    |
| Pb(1)-O(2)          | 3.062(2)            |                   |             |
| Angle               | /°                  | Angle             | /°          |
| O(5C)-Pb(1)-O(6C)   | 52.88(8)            | O(5C)-Pb(1)-O(4A) | 86.02(10)   |
| O(6C)-Pb(1)-O(4A)   | 90.52(10)           | O(5C)-Pb(1)-O(2B) | 79.70(9)    |
| O(6C)-Pb(1)-O(2B)   | 108.95(10)          | O(4A)-Pb(1)-O(2B) | 140.35(9)   |
| O(5C)-Pb(1)-O(A)    | 78.39(8)            | O(6C)-Pb(1)-O(3A) | 120.99(8)   |
| O(4A)-Pb(1)-O(3A)   | 50.91(8)            | O(2B)-Pb(1)-O(3A) | 89.84(8)    |
| O(5C)-Pb(1)-O(1)    | 122.65(9)           | O(6C)-Pb(1)-O(1)  | 81.21(9)    |
| O(4A)-Pb(1)-O(1)    | 131.60(9)           | O(2B)-Pb(1)-O(1)  | 86.39(9)    |
| O(3A)-Pb(1)-O(1)    | 157.36(8)           | O(2)-Pb(1)-O(2B)  | 118.015(2)  |
| O(2)-Pb(1)-O(3A)    | 120.027(2)          | O(2)-Pb(1)-O(4A)  | 90.825(3)   |

|                        |                        |                  |           |
|------------------------|------------------------|------------------|-----------|
| O(2)-Pb(1)-O(5C)       | 152.308(4)             | O(2)-Pb(1)-O(6C) | 99.698(3) |
| O(2)-Pb(1)-O(1)        | 44.970(2)              |                  |           |
| A, -x+1/2,y+1/2,-z+1/2 | B, -x+1/2,y+1/2,-z+1/2 | C, x-1,y+1,-z    |           |

Table S2. Comparison of sensing ability in terms of quenching coefficient ( $K_{sv}$ ) and limit of detection (LOD) of compounds toward  $\text{Cr}_2\text{O}_7^{2-}$ ,  $\text{CrO}_4^{2-}$ ,  $\text{Fe}^{3+}$  and NB.

| Compounds                                                                                                                                                                 | Medium             | Analytes                     | Quenching coefficient ( $K_{sv}$ , $\text{M}^{-1}$ ) | Limit of detection (LOD, M) | Ref.      |
|---------------------------------------------------------------------------------------------------------------------------------------------------------------------------|--------------------|------------------------------|------------------------------------------------------|-----------------------------|-----------|
| [Pb(cbdcp)]·0.5H <sub>2</sub> O·0.5CH <sub>3</sub> OH                                                                                                                     | H <sub>2</sub> O   | $\text{Cr}_2\text{O}_7^{2-}$ | $5.66 \times 10^4$                                   | $^a 1.82 \times 10^{-6}$    | This work |
|                                                                                                                                                                           |                    | $\text{CrO}_4^{2-}$          | $3.46 \times 10^4$                                   | $^a 2.97 \times 10^{-6}$    |           |
|                                                                                                                                                                           |                    | $\text{Fe}^{3+}$             | $8.45 \times 10^3$                                   | $^a 1.35 \times 10^{-6}$    |           |
|                                                                                                                                                                           | DMF                | NB                           | $1.22 \times 10^3$                                   | $^a 7.14 \times 10^{-6}$    |           |
| [PbL <sub>1</sub> ]                                                                                                                                                       | H <sub>2</sub> O   | $\text{Cr}_2\text{O}_7^{2-}$ | $4.3 \times 10^4$                                    | $^a 2.6 \times 10^{-3}$     | 62        |
| [Pb(BPDP)]                                                                                                                                                                | H <sub>2</sub> O   | $\text{Fe}^{3+}$             | $2.2 \times 10^4$                                    | —                           | 63        |
| [Pb <sub>3</sub> (BPDP) <sub>1.5</sub> (OCC <sub>6</sub> H <sub>4</sub> COOH) <sub>3</sub> ]                                                                              | H <sub>2</sub> O   | $\text{Fe}^{3+}$             | $2.23 \times 10^4$                                   | —                           | 63        |
| [Pb <sub>3</sub> O <sub>2</sub> L <sub>2</sub> ]                                                                                                                          | H <sub>2</sub> O   | $\text{Fe}^{3+}$             | $7.8 \times 10^3$                                    | $^a 7.85 \times 10^{-6}$    | 64        |
| [Pb <sub>2</sub> (HL <sub>3</sub> )(bib) <sub>1.5</sub> (H <sub>2</sub> O)]·H <sub>2</sub> O                                                                              | H <sub>2</sub> O   | $\text{Cr}_2\text{O}_7^{2-}$ | $2.8 \times 10^4$                                    | —                           | 65        |
|                                                                                                                                                                           |                    | $\text{CrO}_4^{2-}$          | $7.4 \times 10^3$                                    | —                           |           |
| [Tb <sub>4</sub> L <sub>4</sub> (NO <sub>3</sub> ) <sub>2</sub> (Piv) <sub>2</sub> ]·2CH <sub>3</sub> OH                                                                  | H <sub>2</sub> O   | $\text{Cr}_2\text{O}_7^{2-}$ | $7.44 \times 10^3$                                   | $^a 2.7 \times 10^{-5}$     | 39        |
|                                                                                                                                                                           |                    | $\text{CrO}_4^{2-}$          | $2.998 \times 10^3$                                  | $^a 5.2 \times 10^{-5}$     |           |
|                                                                                                                                                                           |                    | $\text{Fe}^{3+}$             | $1.86 \times 10^4$                                   | $^a 1 \times 10^{-5}$       |           |
| [Zn <sub>3</sub> (mtrb) <sub>3</sub> (btc) <sub>2</sub> ]·3H <sub>2</sub> O                                                                                               | H <sub>2</sub> O   | $\text{Cr}_2\text{O}_7^{2-}$ | $4.62 \times 10^3$                                   | $^a 2.83 \times 10^{-3}$    | 40        |
|                                                                                                                                                                           |                    | $\text{CrO}_4^{2-}$          | $2.77 \times 10^3$                                   | $^a 4.52 \times 10^{-3}$    |           |
|                                                                                                                                                                           |                    | $\text{Fe}^{3+}$             | $6.5 \times 10^3$                                    | $^a 1.78 \times 10^{-3}$    |           |
|                                                                                                                                                                           | MeOH               | NB                           | $2.875 \times 10^3$                                  | —                           |           |
| [Eu(L <sub>5</sub> )(HCOO)]·H <sub>2</sub> O                                                                                                                              | H <sub>2</sub> O   | $\text{Cr}_2\text{O}_7^{2-}$ | $3.1 \times 10^4$                                    | $^b 2 \times 10^{-9}$       | 41        |
|                                                                                                                                                                           |                    | $\text{CrO}_4^{2-}$          | $2.0 \times 10^4$                                    | $^b 1 \times 10^{-9}$       |           |
|                                                                                                                                                                           |                    | $\text{Fe}^{3+}$             | $4.76 \times 10^3$                                   | $^b 1 \times 10^{-9}$       |           |
| [Eu <sub>2</sub> (L <sub>6</sub> ) <sub>1.5</sub> (H <sub>2</sub> O) <sub>2</sub> ·EtOH]·DMF                                                                              | DMF                | $\text{Cr}_2\text{O}_7^{2-}$ | $1.53 \times 10^3$                                   | $^b 1 \times 10^{-5}$       | 42        |
|                                                                                                                                                                           |                    | $\text{Fe}^{3+}$             | $2.94 \times 10^3$                                   | $^b 1 \times 10^{-5}$       |           |
| [EuL <sub>7</sub> ]                                                                                                                                                       | CH <sub>3</sub> CN | $\text{Cr}_2\text{O}_7^{2-}$ | $1.06 \times 10^4$                                   | $^b 1 \times 10^{-6}$       | 59        |
|                                                                                                                                                                           |                    | $\text{Fe}^{3+}$             | $1.40 \times 10^4$                                   | $^b 5 \times 10^{-7}$       |           |
| [TbL <sub>8</sub> ]·2H <sub>2</sub> O                                                                                                                                     | H <sub>2</sub> O   | $\text{Cr}_2\text{O}_7^{2-}$ | $2.31 \times 10^4$                                   | $^a 5.94 \times 10^{-6}$    | 60        |
|                                                                                                                                                                           |                    | $\text{Fe}^{3+}$             | $2.27 \times 10^4$                                   | $^a 8.32 \times 10^{-6}$    |           |
| [Eu(HL <sub>9</sub> )(H <sub>2</sub> O) <sub>2</sub> (NO <sub>3</sub> )]·NO <sub>3</sub>                                                                                  | H <sub>2</sub> O   | $\text{Cr}_2\text{O}_7^{2-}$ | $7.52 \times 10^4$                                   | $^a 1.7 \times 10^{-5}$     | 61        |
|                                                                                                                                                                           |                    | $\text{Fe}^{3+}$             | $4.03 \times 10^4$                                   | $^a 4.3 \times 10^{-5}$     |           |
|                                                                                                                                                                           | DMF                | NB                           | $1.26 \times 10^4$                                   | $^a 2.2 \times 10^{-5}$     |           |
| [Tb(HL <sub>9</sub> )(H <sub>2</sub> O) <sub>2</sub> (NO <sub>3</sub> )]·NO <sub>3</sub>                                                                                  | H <sub>2</sub> O   | $\text{Cr}_2\text{O}_7^{2-}$ | $4.99 \times 10^4$                                   | $^a 2.5 \times 10^{-5}$     | 61        |
|                                                                                                                                                                           |                    | $\text{Fe}^{3+}$             | $4.54 \times 10^4$                                   | $^a 1.6 \times 10^{-5}$     |           |
|                                                                                                                                                                           | DMF                | NB                           | $2.6 \times 10^4$                                    | $^a 1.8 \times 10^{-5}$     |           |
| [W <sub>2</sub> (μ <sub>3</sub> -S) <sub>6</sub> (μ <sub>4</sub> -S) <sub>2</sub> Cu <sub>8</sub> (CN) <sub>4</sub> (3-abpt)]·CH <sub>3</sub> CN·H <sub>2</sub> O         | CH <sub>3</sub> CN | NB                           | $3.94 \times 10^4$                                   | $^a 1 \times 10^{-3}$       | 71        |
| [Zn <sub>24</sub> (BDPO) <sub>12</sub> (DMF) <sub>12</sub> ]·6DMF·52H <sub>2</sub> O                                                                                      | DMF                | NB                           | $9.1 \times 10^2$                                    | —                           | 72        |
| [Eu <sub>4</sub> (INO) <sub>5</sub> (μ <sub>3</sub> -OH) <sub>2</sub> Cl <sub>4</sub> (H <sub>2</sub> O)]·(NO <sub>3</sub> ) <sub>5</sub> (H <sub>2</sub> O) <sub>5</sub> | H <sub>2</sub> O   | NB                           | $0.3 \times 10^3$                                    | $^b 3 \times 10^{-6}$       | 26        |

<sup>a</sup> Detection limitation calculated by  $3\delta/k$ ; <sup>b</sup> Detection limitation according to the experiment data.

(H<sub>2</sub>L<sub>1</sub>=6,6'-(perfluoropropane-2,2-diyl)bis(2,3-dihydrophthalazine-1,4-dione);

H<sub>2</sub>BPDP = 4,4'-biphenyldiphosphonate(monoethyl ester);

H<sub>2</sub>L<sub>2</sub> = 4-(1H-tetrazol-5-yl)phenol;

$H_5L_3$  = 3,5-di(2',4'-dicarboxylphenyl)benzoic acid;  
 bib = 1,4-bis(imidazol-1-yl) benzene;  
 $H_2L_4$  = 2-(((2-hydroxy-3-methoxybenzyl)imino)methyl)-6-methoxyphenol;  
 piv = pivalic acid;  
 mtrb = 1,3-bis(1,2,4-triazole-4-ylmethyl)benzene;  
 btc = 1,3,5-benzenetricarboxylate;  
 $H_2L_5$  = 5-((pyridin-3-yloxy)methyl)isophthalic acid;  
 $L_6$  = 5,5'-(carbonylbis(azanediyl))diisophthalic acid;  
 $L_7$  = 3-bis(3-carboxyphenyl)imidazolium;  
 $H_2L_9$  = 4-(3,5-dicarboxylphenyl)-2-methylpyridine;  
 3-abpt = 4-amino-3,5-bis(3-pyridyl)-1,2,4-triazole;  
 $H_4BDPO$  = 2,4-Bis(3,5-dicarboxyphenylamino)-6-ol triazine;  
 HINO = isonicotinic acid N-oxide.)

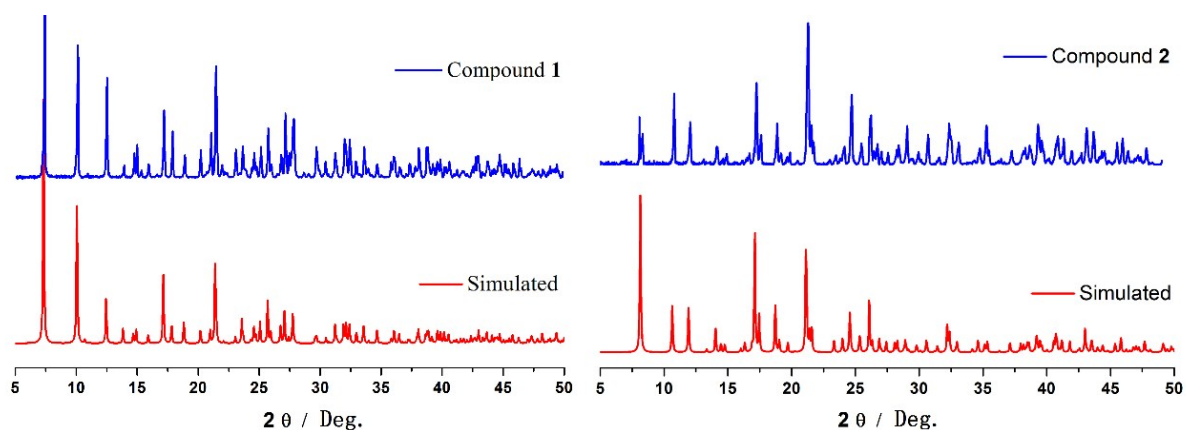

**Fig. S1** PXRD patterns of simulated and as-synthesized compounds **1** and **2**.

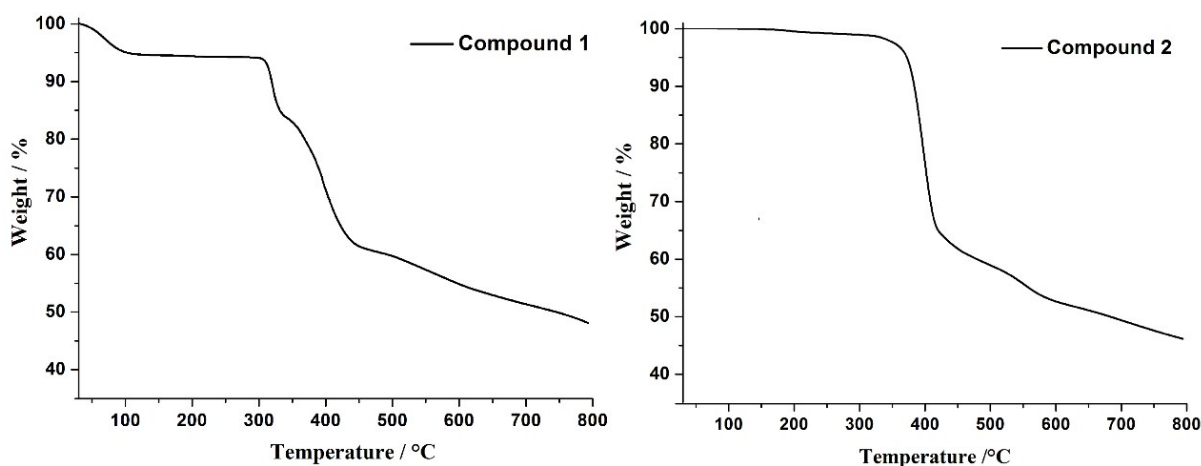

**Fig. S2** TGA diagrams of as-synthesized compounds **1** and **2**.

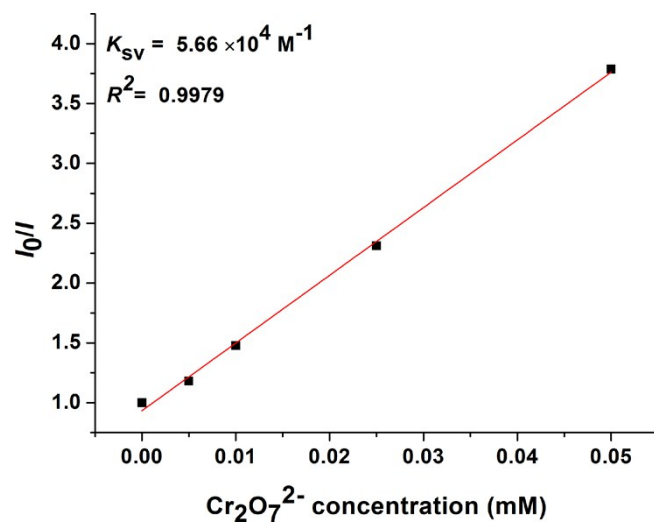

**Fig. S3**  $I_0/I$  versus concentration of  $\text{Cr}_2\text{O}_7^{2-}$  plotted according to Stern-Volmer equation.

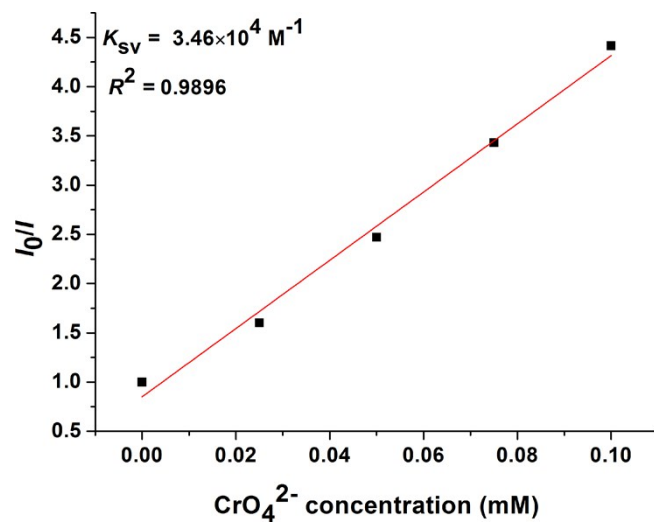

**Fig. S4**  $I_0/I$  versus concentration of  $\text{CrO}_4^{2-}$  plotted according to Stern-Volmer equation.

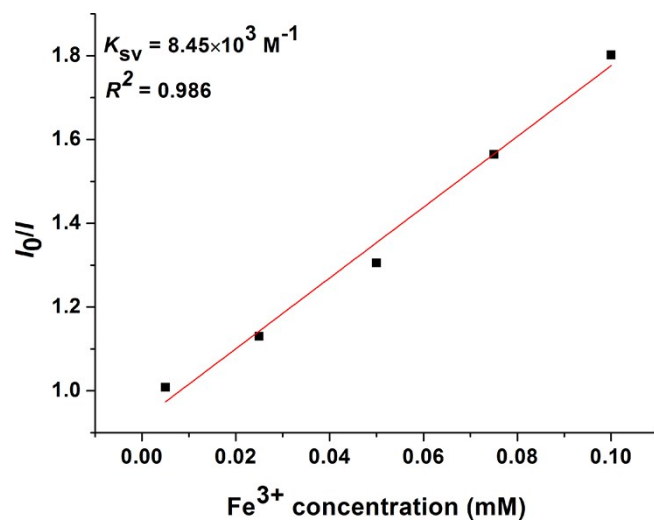

**Fig. S5**  $I_0/I$  versus concentration of  $\text{Fe}^{3+}$  plotted according to Stern-Volmer equation.

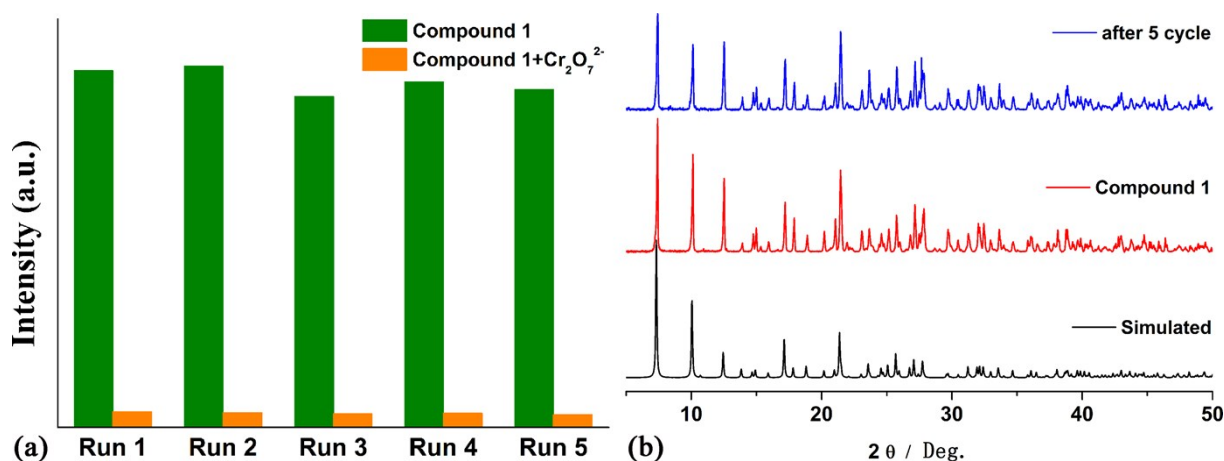

**Fig. S6** (a) Luminescent intensity of compound **1** and sensing Cr<sub>2</sub>O<sub>7</sub><sup>2-</sup> (0.5 mM) during 5 times recycling experiments; (b) PXRD patterns of simulation, before and after 5 times recycling experiments.

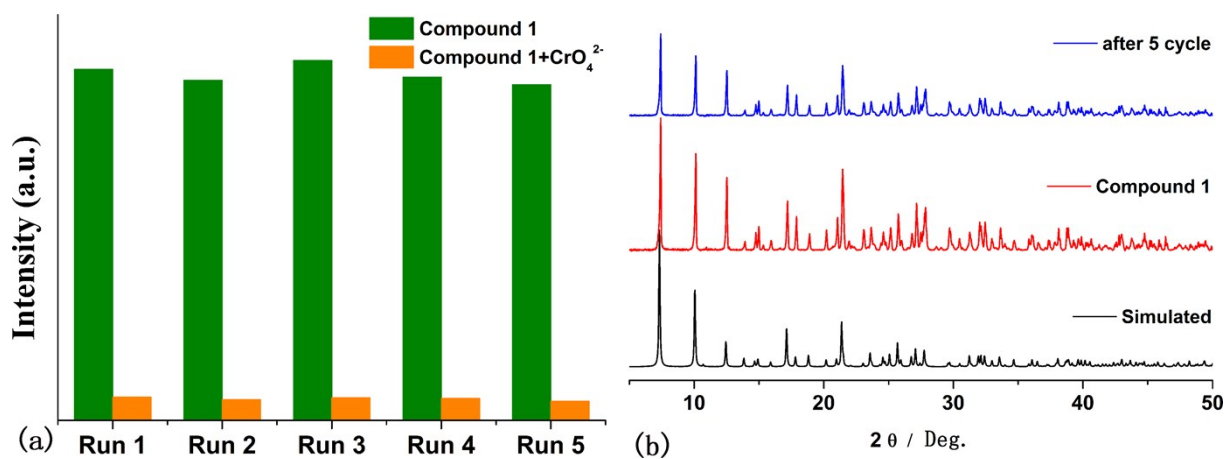

**Fig. S7** (a) Luminescent intensity of compound **1** and sensing CrO<sub>4</sub><sup>2-</sup> (0.5 mM) during 5 times recycling experiments; (b) PXRD patterns of simulation, before and after 5 times recycling experiments.

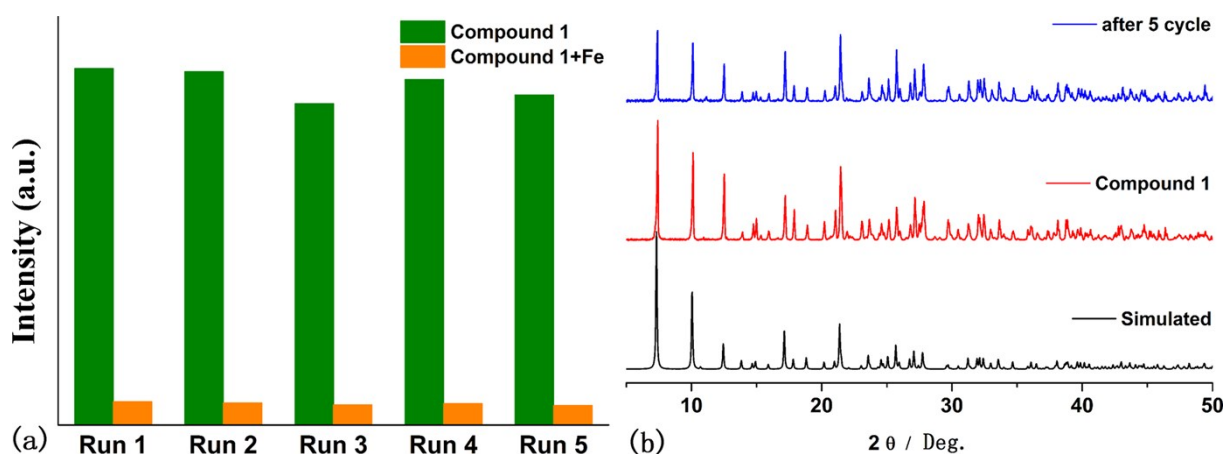

**Fig. S8** (a) Luminescent intensity of compound **1** and sensing Fe<sup>3+</sup> (1.5 mM) during 5 times recycling experiments; (b) PXRD patterns of simulation, before and after 5 times recycling experiments.

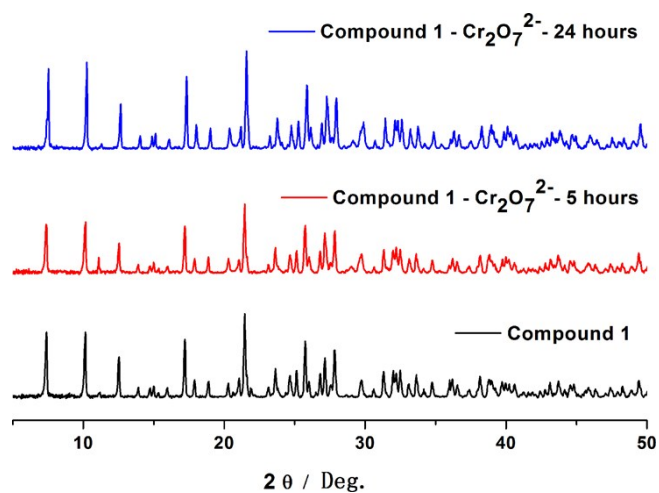

**Fig. S9** The PXR D patterns of compound 1 before and after immersing in  $\text{Cr}_2\text{O}_7^{2-}$  aqueous solution for 5 hours and 24 hours.

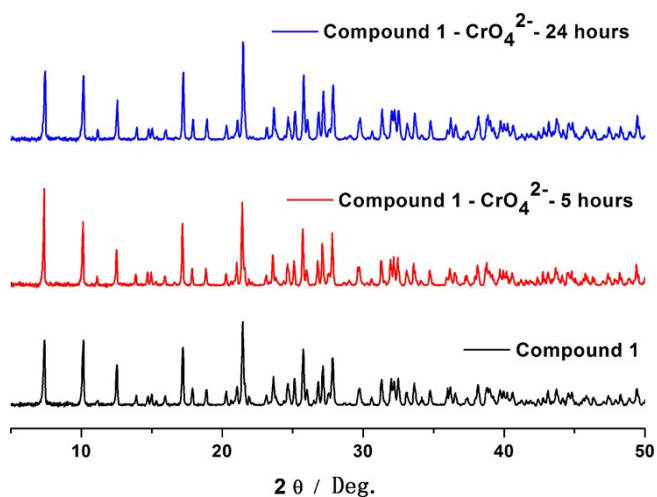

**Fig. S10** The PXR D patterns of compound 1 before and after immersing in  $\text{CrO}_4^{2-}$  aqueous solution for 5 hours and 24 hours.

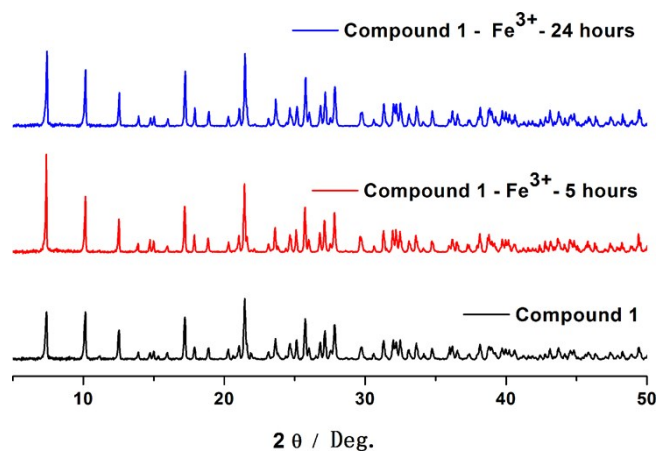

**Fig. S11** The PXR D patterns of compound 1 before and after immersing in  $\text{Fe}^{3+}$  aqueous solution for 5 hours and 24 hours.



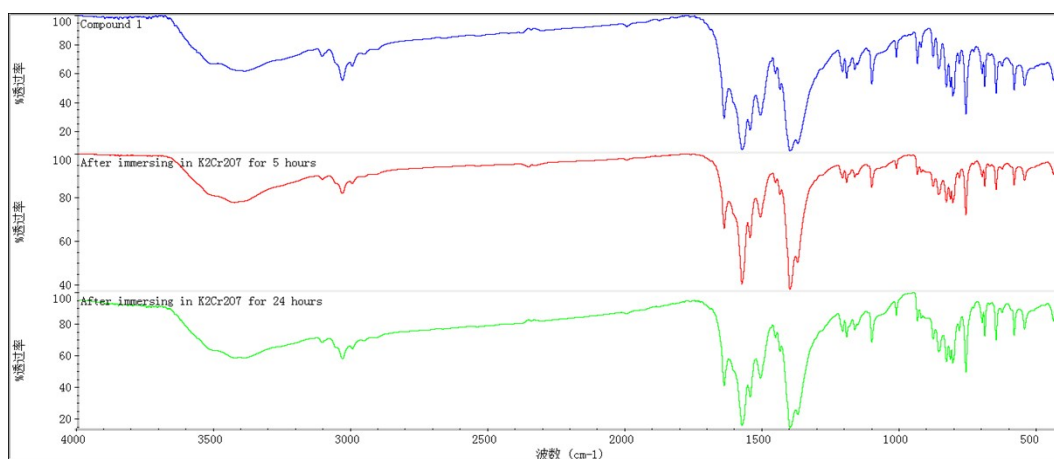

**Fig. S12** The IR diagrams of compound **1** before and after immersing in  $\text{Cr}_2\text{O}_7^{2-}$  aqueous solution for 5 hours and 24 hours.

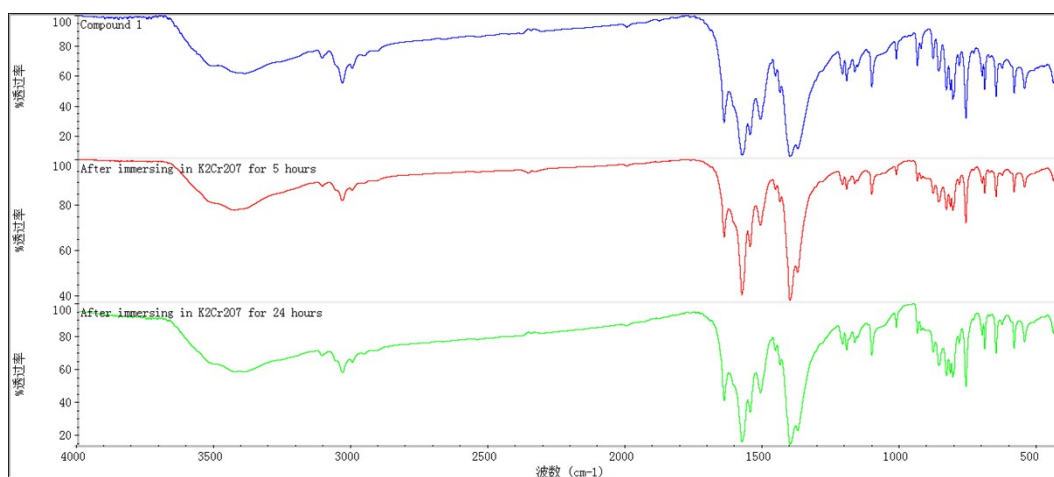

**Fig. S13** The IR diagrams of compound **1** before and after immersing in  $\text{CrO}_4^{2-}$  aqueous solution for 5 hours and 24 hours.

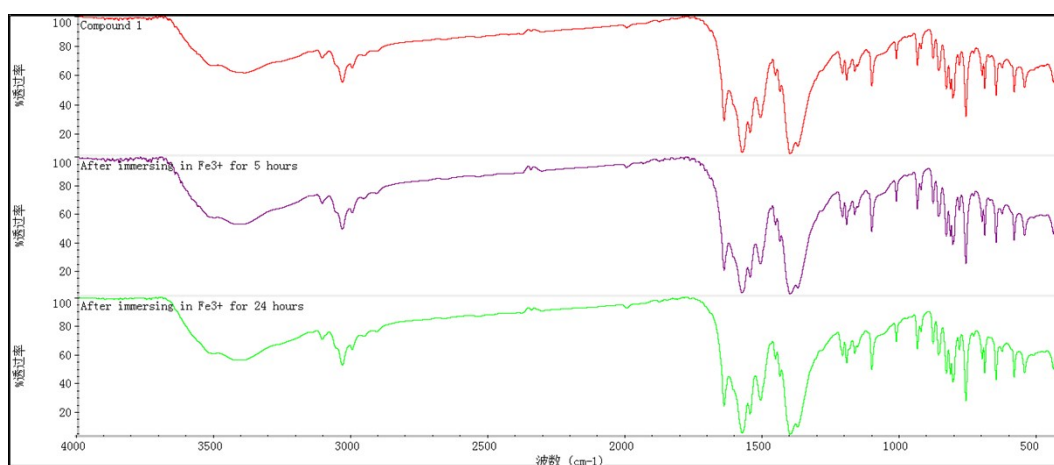

**Fig. S14** The IR diagrams of compound **1** before and after immersing in  $\text{Fe}^{3+}$  aqueous solution for 5 hours and 24 hours.

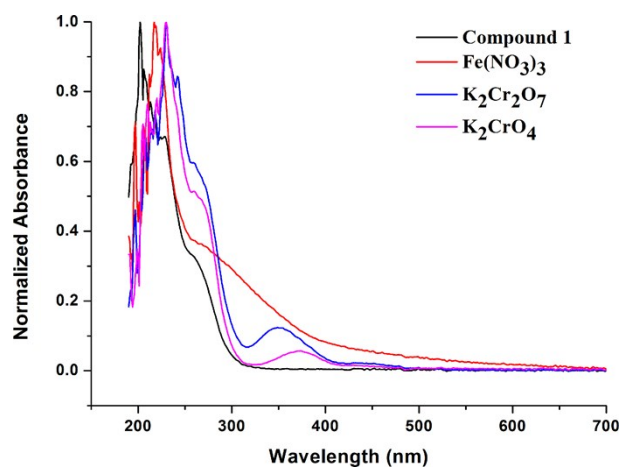

**Fig. S15** The UV-vis absorption spectra of compound **1** and  $\text{Cr}_2\text{O}_7^{2-}$ ,  $\text{CrO}_4^{2-}$  and  $\text{Fe}^{3+}$  aqueous solution (1.5mM).

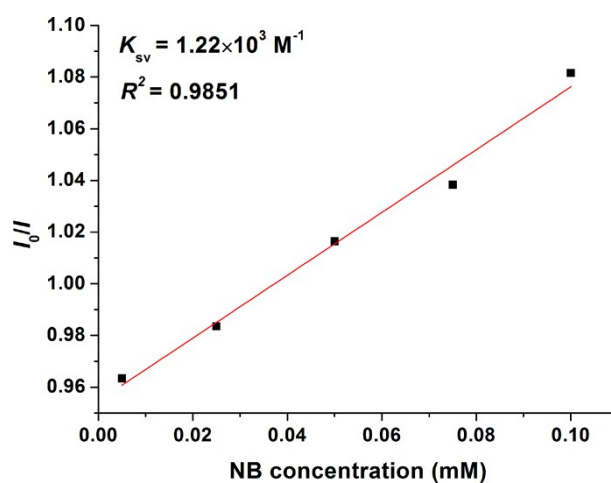

**Fig. S16**  $I_0/I$  versus concentration of NB plotted according to Stern-Volmer equation.

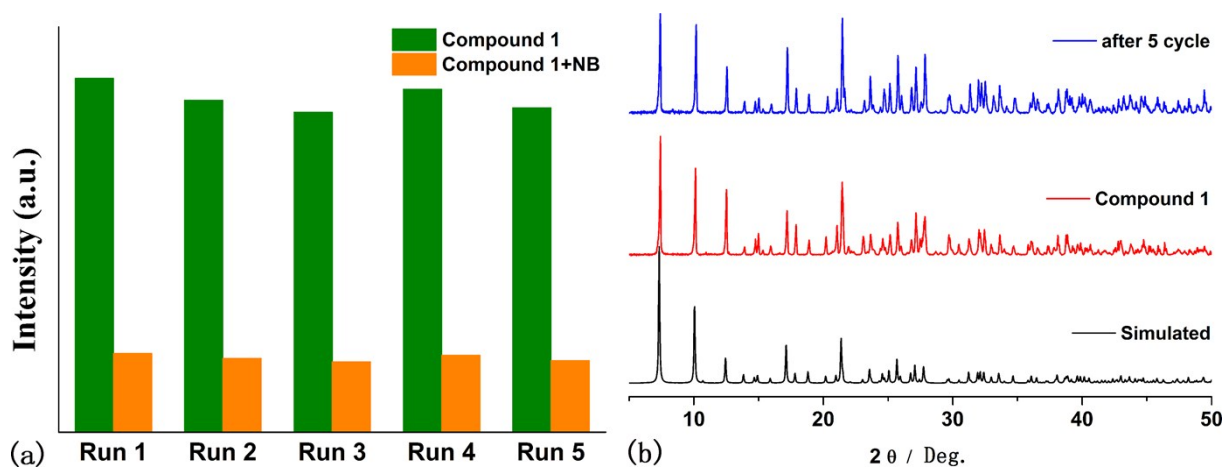

**Fig. S17** (a) Luminescent intensity of compound **1** and sensing NB during 5 times recycling experiments; (b) PXRD patterns of simulation, before and after 5 times recycling experiments.

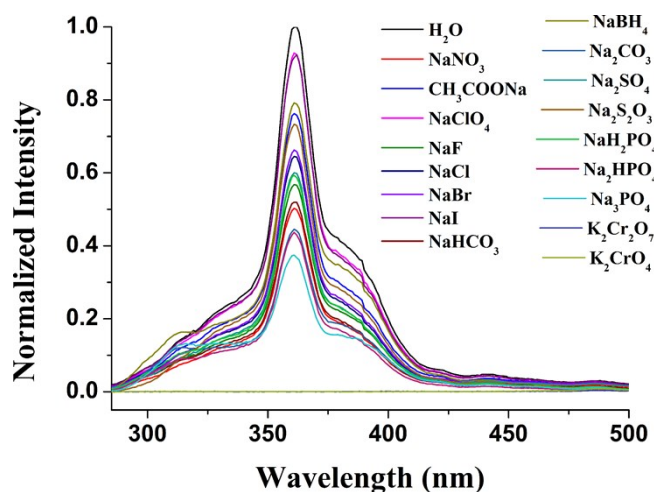

**Fig. S18** Normalized luminescent intensities of compound 1 dispersed in inorganic anion aqueous solution.

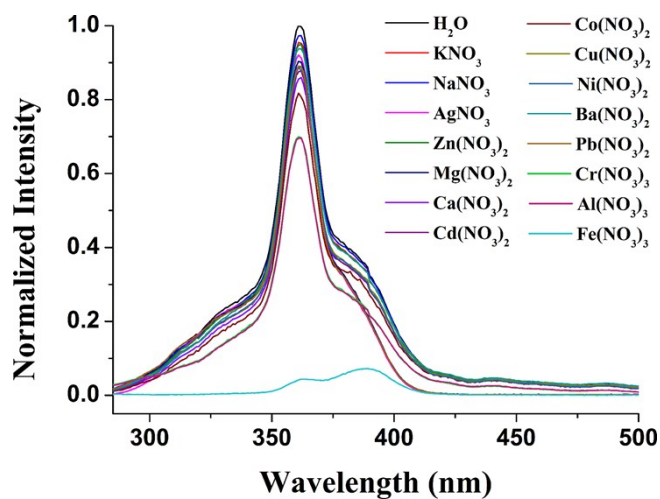

**Fig. S19** Normalized luminescent intensities of compound 1 dispersed in metal cations aqueous solution.

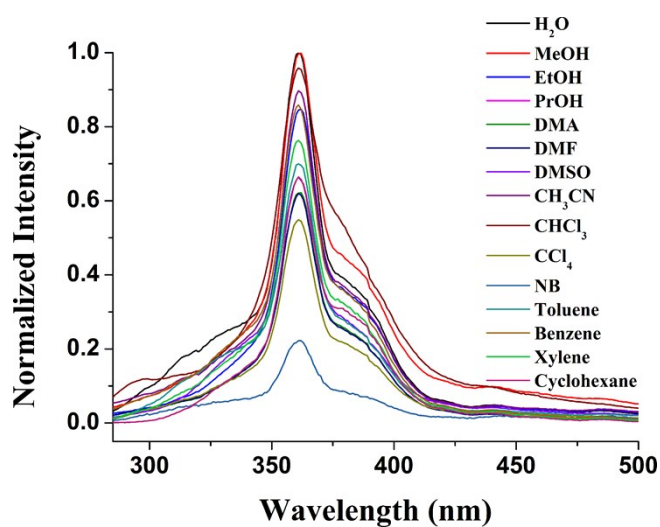

**Fig. S20** Normalized luminescent intensities of compound 1 dispersed in different organic solvents.

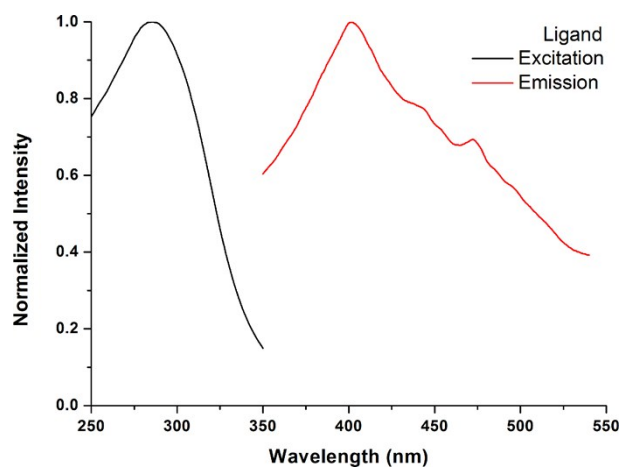

**Fig. S21** Solid state excitation and emission spectra of free ligand. ( $\lambda_{\text{ex}} = 280 \text{ nm}$ ,  $\lambda_{\text{em}} = 402 \text{ nm}$ )
